# Supplementary material for: Laccase—a natural source for the synthesis of benzofuro[2,3-c]pyrazolin-5-ones
Source: Royal Society of Chemistry journal article supplement (doi:10.1039/c2cy20452e), 2012-09-15
Supplement: c2cy20452e.pdf [file c2cy20452e.pdf]

### General procedure for the reaction of pyrazoline-5-ones and catechols/hydroquinones

Catechol or hydroquinone (1 mmol) and pyrazolinone (1.5 mmol) were taken in 15 mL of buffer solution. Then, purified laccase (400U) was added to the resultant solution and stirred well. The progress of the reaction was monitored by TLC examination at an interval of every 30 min. Upon completion of the reaction, the reaction mixture was extracted with ethylacetate (3x15). The organic layer was dried over anhydrous Na<sub>2</sub>SO<sub>4</sub>. The product was purified by column chromatography using aluminium oxide as a stationary phase and hexane:ethyl acetate (80:20) as a mobile phase. Products were unambiguously characterized by spectral data.

#### Characterization of the products:

**Compound 3a:** 3-Methyl-1-phenyl-1*H*-benzofuro[2,3-*c*]pyrazole-5,6-diol: IR (KBr) 3448, 3441, 1656, 1590, 1515, 1491, 1479 cm<sup>-1</sup>; <sup>1</sup>H NMR, δ (400MHz, DMSO-*d*<sub>6</sub>) 2.09 (s, 3H, CH<sub>3</sub>), 5.33 (s, br, OH), 7.33 (s, 1H, ArH), 7.38 (s, 1H, ArH), 7.45-7.62 (m, 5H, ArH); <sup>13</sup>C NMR, δ (100MHz, DMSO-*d*<sub>6</sub>) 13.01, 107.00, 114.14, 116.19, 120.11, 123.24, 125.12, 128.99, 135.19, 139.81, 144.11, 144.89, 145.56, 149.35

**Compound 3b:** 3,7-Dimethyl-1-phenyl-1*H*-benzofuro[2,3-*c*]pyrazole-5,6-diol: IR (KBr) 3446, 3440, 1654, 1590, 1513, 1489, 1475 cm<sup>-1</sup>; <sup>1</sup>H NMR, δ (400MHz, DMSO-*d*<sub>6</sub>) 2.03 (s, 3H, CH<sub>3</sub>), 2.42 (s, 3H, CH<sub>3</sub>), 5.29 (s, br, OH), 7.31 (s, 1H, ArH), 7.40-7.58 (m, 5H, ArH); <sup>13</sup>C NMR, δ (100MHz, DMSO-*d*<sub>6</sub>) 10.21, 12.98, 106.82, 114.11, 116.49, 119.10, 123.42, 125.56, 129.01, 135.49, 139.85, 144.10, 144.84, 145.76, 149.75

**Compound 3c:** 3-Methyl-7-methoxy-1-phenyl-1*H*-benzofuro[2,3-*c*]pyrazole-5,6-diol: IR(KBr) 3440, 3439, 1650, 1590, 1515, 1491, 1479, 1125 cm<sup>-1</sup>; <sup>1</sup>H NMR, δ (400MHz, DMSO-*d*<sub>6</sub>) 2.15 (s, 3H, CH<sub>3</sub>), 3.92 (s, 3H, OCH<sub>3</sub>), 5.46 (s, br, OH), 7.67 (s, 1H, ArH), 7.70-7.92 (m, 5H, ArH); <sup>13</sup>C NMR, δ (100MHz, DMSO-*d*<sub>6</sub>) 13.67, 65.21, 107.49, 115.14, 116.69, 120.71, 123.74, 126.02, 129.89, 135.79, 139.93, 144.71, 145.49, 145.96, 149.85

**Compound 3f:** 3-Methyl-1*H*-benzofuro[2,3-*c*]pyrazole-5,6-diol: IR (KBr) 3441, 3435, 1650, 1590, 1515, 1491, 1483 cm<sup>-1</sup>; <sup>1</sup>H NMR, δ (400MHz, DMSO-*d*<sub>6</sub>) 2.04 (s, 3H, CH<sub>3</sub>), 5.30 (s, br, OH), 7.31 (s, 1H, ArH), 7.33 (s, 1H, ArH), 12.62 (s, br, NH); <sup>13</sup>C NMR, δ (100MHz, DMSO-*d*<sub>6</sub>) 12.90, 105.78, 112.11, 133.79, 138.90, 143.11, 144.34, 145.12, 148.35

**Compound 3g:** 3,7-Dimethyl-1*H*-benzofuro[2,3-*c*]pyrazole-5,6-diol: IR (KBr) 3439, 3430, 1648, 1587, 1510, 1490, 1481 cm<sup>-1</sup>; <sup>1</sup>H NMR, δ (400MHz, DMSO-*d*<sub>6</sub>) 2.03 (s, 3H, CH<sub>3</sub>), 2.39 (s, 3H, CH<sub>3</sub>), 5.29 (s, br, OH), 7.03 (s, 1H, ArH), 12.60 (s, br, NH); <sup>13</sup>C NMR, δ (100MHz, DMSO-*d*<sub>6</sub>) 9.89, 12.85, 105.70, 112.01, 133.12, 139.00, 143.65, 144.43, 145.62, 148.53

**Compound 3h:** 3-Methyl-7-methoxy-1*H*-benzofuro[2,3-*c*]pyrazole-5,6-diol: IR (KBr) 3437, 3429, 1650, 1590, 1515, 1489, 1483, 1109 cm<sup>-1</sup>; <sup>1</sup>H NMR, δ (400MHz, DMSO-*d*<sub>6</sub>) 2.10 (s, 3H, CH<sub>3</sub>), 3.79 (s, 3H, OCH<sub>3</sub>), 5.39 (s, br, OH), 7.38 (s, 1H, ArH), 12.69 (s, br, NH); <sup>13</sup>C NMR, δ (100MHz, DMSO-*d*<sub>6</sub>) 12.98, 68.20, 105.68, 112.09, 134.10, 138.94, 143.10, 144.54, 145.67, 148.23

**Compound 5a:** 3-Methyl-1-phenyl-1*H*-benzofuro[2,3-*c*]pyrazole-4,7-diol: IR (KBr) 3450, 3448, 1659, 1593, 1513, 1495, 1481 cm<sup>-1</sup>; <sup>1</sup>H NMR, δ (400MHz, DMSO-*d*<sub>6</sub>) 2.06 (s, 3H, CH<sub>3</sub>), 5.35 (s, br, OH), 6.83 (d, 1H, ArH), 6.92 (d, 1H, ArH), 7.50-7.62 (m, 5H, ArH); <sup>13</sup>C NMR, δ (100MHz, DMSO-*d*<sub>6</sub>) 13.8, 106.12, 114.23, 117.89, 119.21, 124.24, 126.12, 129.09, 135.89, 139.80, 144.01, 144.09, 145.01, 149.45

**Compound 5b:** 3,6-Dimethyl-1-phenyl-1*H*-benzofuro[2,3-*c*]pyrazole-4,7-diol: IR (KBr) 3448, 3445, 1660, 1589, 1510, 1491, 1480 cm<sup>-1</sup>; <sup>1</sup>H NMR, δ (400MHz, DMSO-*d*<sub>6</sub>) 2.06 (s, 3H, CH<sub>3</sub>), 2.32 (s, 3H, CH<sub>3</sub>), 5.30 (s, br, OH), 6.81 (s, 1H, ArH), 7.38-7.51 (m, 5H, ArH); <sup>13</sup>C NMR, δ (100MHz, DMSO-*d*<sub>6</sub>) 10.12, 13.12, 106.67, 113.90, 117.13, 120.01, 124.42, 126.56, 128.98, 135.12, 139.81, 144.00, 144.09, 145.07, 150.01

**Compound 5c:** 3-Methyl-6-methoxy-1-phenyl-1*H*-benzofuro[2,3-*c*]pyrazole-4,7-diol: IR (KBr) 3453, 3450, 1661, 1593, 1515, 1498, 1488, 1119 cm<sup>-1</sup>; <sup>1</sup>H NMR, δ (400MHz, DMSO-*d*<sub>6</sub>) 2.06 (s, 3H, CH<sub>3</sub>), 3.52 (s, 3H, OCH<sub>3</sub>), 5.56 (s, br, OH), 6.90 (s, 1H, ArH), 7.47-7.59 (m, 5H, ArH); <sup>13</sup>C NMR, δ (100MHz, DMSO-*d*<sub>6</sub>) 14.45, 64.67, 107.34, 114.78, 118.19, 120.11, 124.89, 126.92, 129.91, 136.01, 139.80, 144.45, 144.73, 145.39, 150.12

**Compound 5f:** 3-Methyl-1*H*-benzofuro[2,3-*c*]pyrazole-4,7-diol: IR (KBr) 3444, 3431, 1649, 1592, 1510, 1491, 1484 cm<sup>-1</sup>; <sup>1</sup>H NMR, δ (400MHz, DMSO-*d*<sub>6</sub>) 2.04 (s, 3H, CH<sub>3</sub>), 5.30 (s, br, OH), 6.31 (d, 1H, ArH), 6.33 (d, 1H, ArH), 12.62 (s, br, NH); <sup>13</sup>C NMR, δ (100MHz, DMSO-*d*<sub>6</sub>) 12.67, 105.70, 112.01, 133.54, 138.45, 143.10, 144.13, 145.00, 148.15

**Compound 5g:** 3,6-Dimethyl-1*H*-benzofuro[2,3-*c*]pyrazole-4,7-diol: IR (KBr) 3441, 3436, 1649, 1592, 1519, 1490, 1481 cm<sup>-1</sup>; <sup>1</sup>H NMR, δ (400MHz, DMSO-*d*<sub>6</sub>) 2.01 (s, 3H, CH<sub>3</sub>), 2.24 (s, 3H, CH<sub>3</sub>), 5.20 (s, br, OH), 6.31 (s, 1H, ArH), 12.23 (s, br, NH); <sup>13</sup>C NMR, δ (100MHz, DMSO-*d*<sub>6</sub>) 9.69, 12.35, 105.69, 112.00, 133.01, 138.56, 143.15, 144.13, 145.02, 148.35

**Compound 5h:** 3-Methyl-6-methoxy-1*H*-benzofuro[2,3-*c*]pyrazole-4,7-diol: IR (KBr) 3446, 3435, 1650, 1590, 1519, 1495, 1483, 1128 cm<sup>-1</sup>; <sup>1</sup>H NMR, δ (400MHz, DMSO-*d*<sub>6</sub>) 2.10 (s, 3H, CH<sub>3</sub>), 3.59 (s, 3H, OCH<sub>3</sub>), 5.39 (s, br, OH), 6.38 (s, 1H, ArH), 12.29 (s, br, NH); <sup>13</sup>C NMR, δ (100MHz, DMSO-*d*<sub>6</sub>) 12.90, 68.11, 105.15, 112.00, 133.90, 138.14, 143.01, 143.67, 145.14, 148.03
